# Supplementary material
Source: PubMed Central journal article supplement (PMC7013216)
Supplement: ajtr0012-0162-f5.pdf [file ajtr0012-0162-f5.pdf]

## Circular RNAs as biomarkers for NSCLC

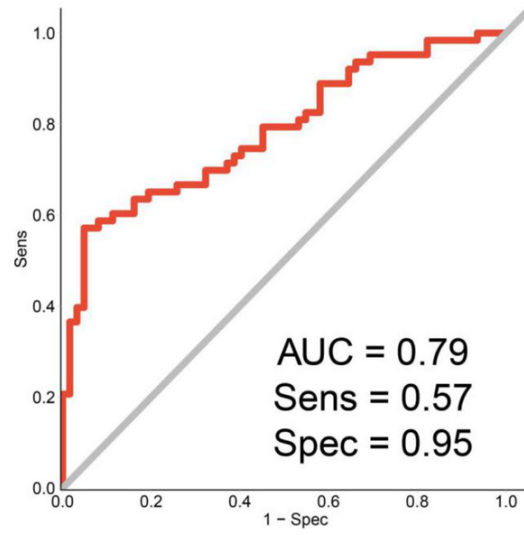

**Figure S1.** ROC curve analysis of ABCA3 mRNA expression in non-small cell lung cancer versus control tissues.
